# Supplementary material for: Annealing-induced ultra-efficient NIR-to-VIS upconversion of nano-/micro-scale α and β NaYF4:Er3+,Yb3+ crystals
Source: Royal Society of Chemistry journal article supplement (doi:10.1039/c3ce40362a), 2013-01-01
Supplement: c3ce40362a.pdf [file c3ce40362a.pdf]

## Supporting Information

### Annealing-induced ultra-efficient NIR-to-VIS upconversion of nano-/micro-scale $\alpha$ and $\beta$ NaYF<sub>4</sub>:Er<sup>3+</sup>,Yb<sup>3+</sup> crystals

Hassane Assaouadi, Guo-Bin Shan, Nathan Dyck and George P. Demopoulos

#### Table of Contents

---

|                                                                                                                                                                                                                                                                                                                                   |
|-----------------------------------------------------------------------------------------------------------------------------------------------------------------------------------------------------------------------------------------------------------------------------------------------------------------------------------|
| <b>Figure S1.</b> XRD patterns of $\alpha$ -NaYF <sub>4</sub> :Er <sup>3+</sup> ,Yb <sup>3+</sup> (C1, green; #1, blue) and $\beta$ -NaYF <sub>4</sub> :Er <sup>3+</sup> ,Yb <sup>3+</sup> (C2, yellow; C3, pink; C5, black), and 700 °C-annealed $\alpha$ -NaYF <sub>4</sub> :Er <sup>3+</sup> ,Yb <sup>3+</sup> (#1, red) ..... |
| <b>Figure S2.</b> FTIR spectra of citrate-modified NaYF <sub>4</sub> :Er <sup>3+</sup> ,Yb <sup>3+</sup> crystals (sample C5) and its annealed product at 700°C. ....                                                                                                                                                             |
| <b>Figure S3.</b> Raman spectra of various NaYF <sub>4</sub> :Er <sup>3+</sup> ,Yb <sup>3+</sup> crystals before (as-prepared, black) and after annealing at 350 °C (green) and 700 °C (red) .....                                                                                                                                |
| <b>Table S1.</b> Raman spectra data (cm <sup>-1</sup> ) of doped $\alpha$ - and $\beta$ -NaYF <sub>4</sub> :Er <sup>3+</sup> ,Yb <sup>3+</sup> crystals .....                                                                                                                                                                     |
| <b>Figure S4.</b> Typical SEM image of 700°C annealed $\beta$ -NaYF <sub>4</sub> :Er <sup>3+</sup> ,Yb <sup>3+</sup> crystals (sample C3). The annealed crystals were ground before their fluorescence was measured (Figure 5). ....                                                                                              |

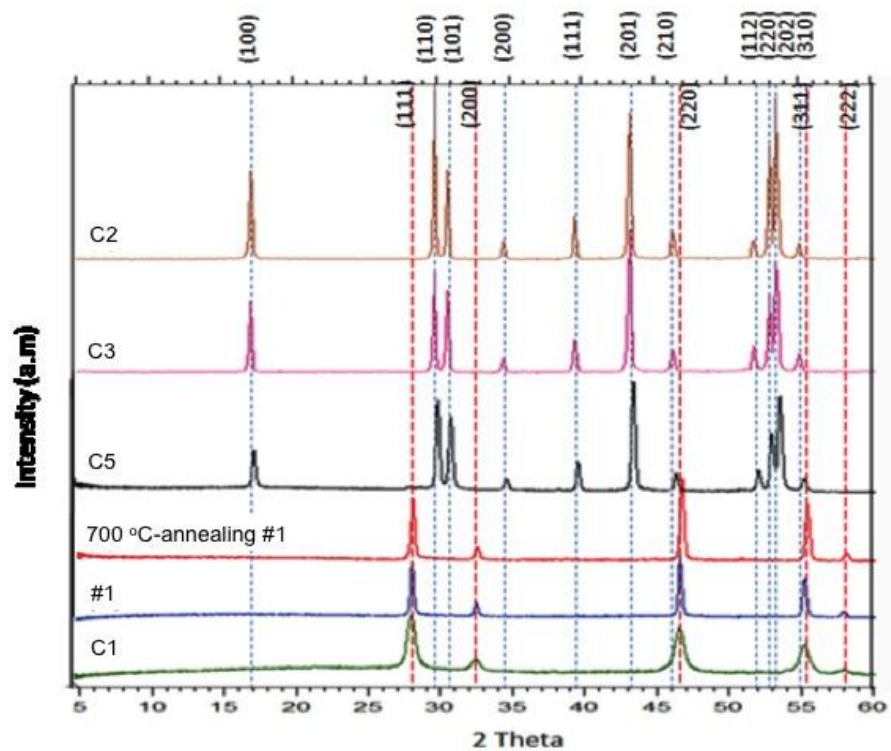

**Fig.S1** XRD patterns of  $\alpha$ - $\text{NaYF}_4$ : $\text{Er}^{3+}$ , $\text{Yb}^{3+}$  (C1, green; #1, blue) and  $\beta$ - $\text{NaYF}_4$ : $\text{Er}^{3+}$ , $\text{Yb}^{3+}$  (C2, yellow; C3, pink; C5, black), and 700 °C-annealed  $\alpha$ - $\text{NaYF}_4$ : $\text{Er}^{3+}$ , $\text{Yb}^{3+}$  (#1, red)

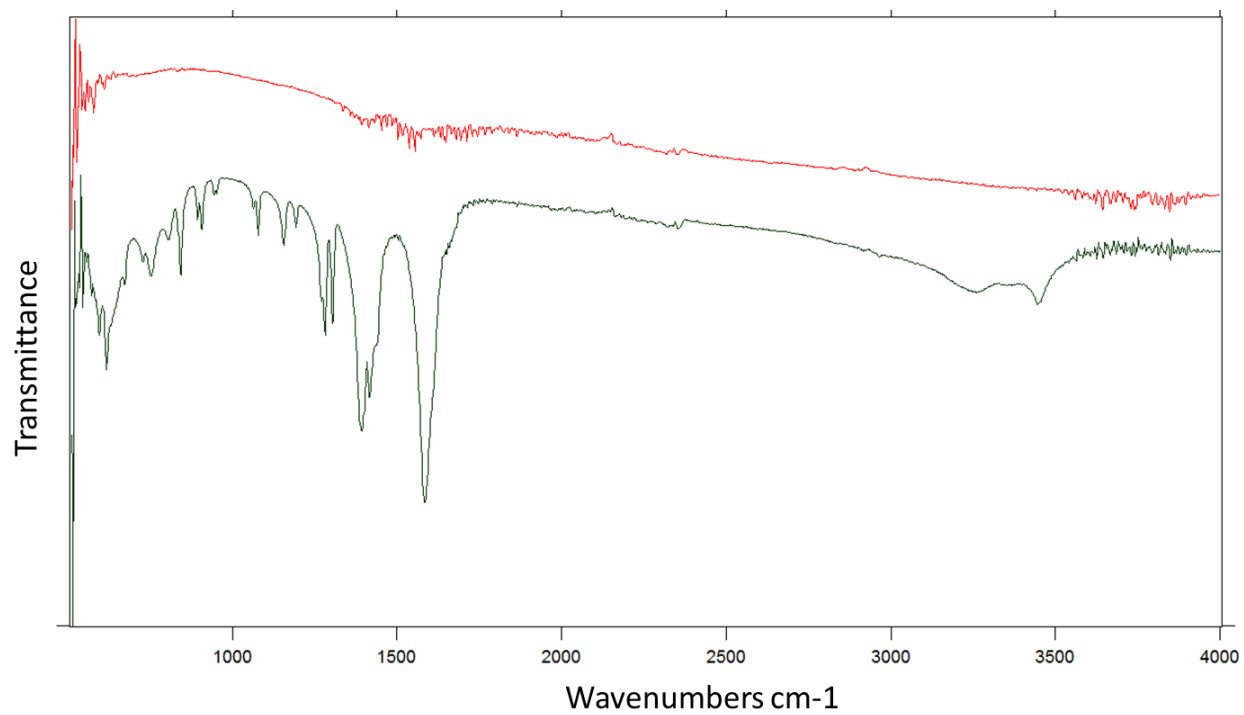

**Fig.S2.** FTIR spectra of citrate-modified NaYF<sub>4</sub>:Er<sup>3+</sup>, Yb<sup>3+</sup> crystals (sample C5) **and its annealed product at 700°C.**

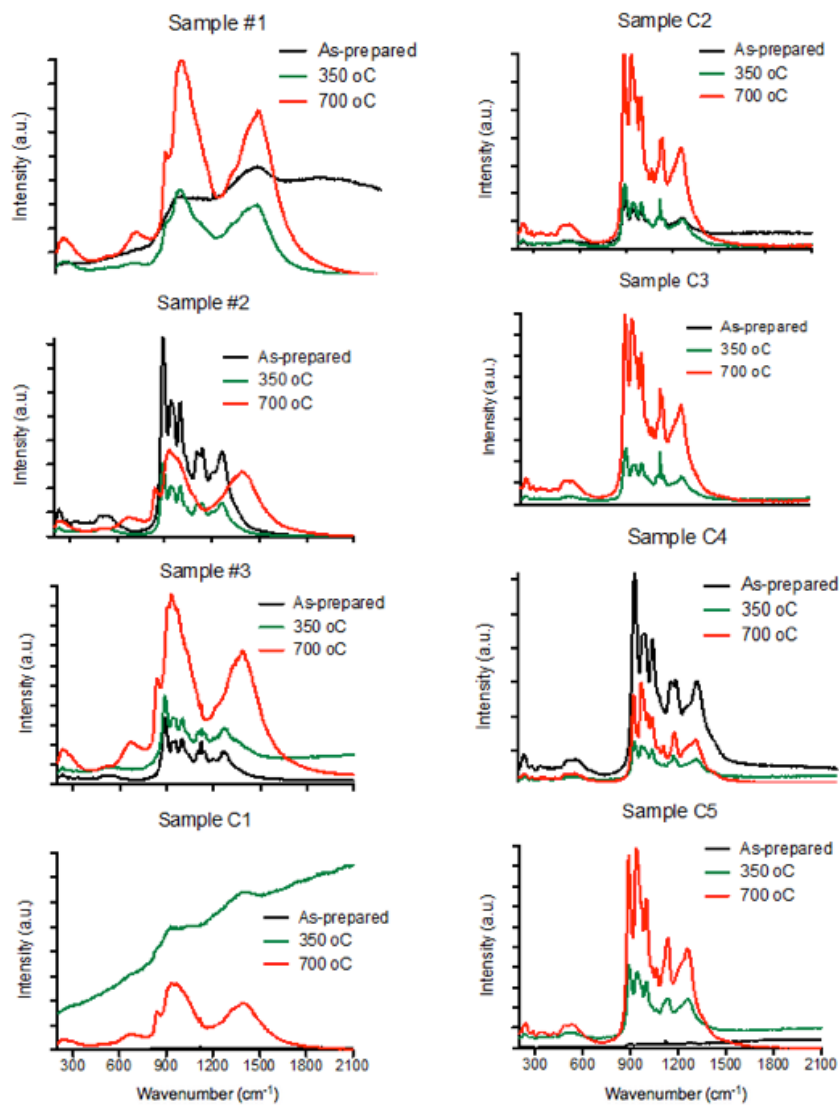

**Fig.S3** Raman spectra of various NaYF<sub>4</sub>:Er<sup>3+</sup>, Yb<sup>3+</sup> crystals before (as-prepared, black) and after annealing at 350 °C (green) and 700 °C (red)

**Table S1.** Raman spectra data (cm<sup>-1</sup>) of doped α- and β-NaYF<sub>4</sub>:Er<sup>3+</sup>, Yb<sup>3+</sup> crystals

| #1   |      |      | #2    |      |      | #3   |      |      | C1   |      |      | C2     |      |        | C3   |      |      | C4     |      |      | C5   |      |      |      |
|------|------|------|-------|------|------|------|------|------|------|------|------|--------|------|--------|------|------|------|--------|------|------|------|------|------|------|
| Amb. | 350° | 700° | Amb.  | 350° | 700° | Amb. | 350° | 700° | Amb. | 350° | 700° | Amb.   | 350° | 700°   | Amb. | 350° | 700° | Amb.   | 350° | 700° | Amb. | 350° | 700° |      |
| α    | α    | α    | β     | β    | α    | β    | β    | α    | α    | α    | α    | β      | β    | β      | β    | β    | β    | β      | β    | β    | β    | β    | β    | β    |
| 1416 | 1384 | 1390 |       |      | 1402 |      |      | 1392 | 1400 | 1431 | 1411 |        |      |        |      |      |      |        |      |      |      |      |      |      |
|      |      |      | 1274  | 1271 |      | 1273 | 1273 |      |      |      |      | 1265   | 1270 | 1265   | 1276 | 1262 | 1259 | 1273   | 1267 | 1267 | 1285 | 1267 | 1267 |      |
|      |      |      | 1230  | 1232 |      | 1229 |      |      |      |      |      |        |      |        | 1240 |      | 1137 | 1228sh |      | 1229 |      |      | 1240 |      |
|      |      |      | 1144  | 1144 |      | 1144 | 1143 |      |      |      |      | 1148   | 1138 | 1138   | 1145 | 1124 |      | 1143   | 1141 | 1135 |      |      | 1138 | 1137 |
|      |      |      | 1135  | 1132 |      | 1137 |      |      |      |      |      | 1122.6 |      |        | 1122 |      |      | 1138   | 1045 |      | 1122 | 1114 | 1038 |      |
|      |      |      |       |      |      |      |      |      | 1041 |      |      |        |      | 1069   | 1119 |      | 1068 |        |      | 1065 |      |      | 1092 |      |
|      |      |      |       |      |      |      |      |      |      |      |      |        |      | 1030sh |      |      |      |        |      | 1038 |      |      | 1038 |      |
| 1003 |      |      | 1001  | 1003 |      | 1003 | 1004 |      | 979  | 979  |      | 1001.5 | 1003 | 1000   | 1000 | 1000 | 1000 | 1001   | 1001 | 1000 | 1001 | 1000 | 1000 |      |
|      | 932  | 937  | 945   | 948  | 932  | 956  | 960  | 939  |      |      |      | 958.6  | 955  | 935    | 961  | 960  | 997  | 955    | 940  | 972  | 985  | 951  | 971  |      |
|      |      | 871  | 893   | 893  | 849  | 895  | 891  | 875  |      |      | 844  | 893    | 893  | 888    | 890  | 895  | 939  | 895    | 891  | 935  | 896  | 899  | 938  |      |
|      | 687  | 701  | 552   | 575  | 699  | 555  | 580  | 703  |      | 714  |      | 550    | 572  | 555    | 565  | 565  | 888  | 548br  | 567  | 888  | 587w | 560  | 888  |      |
|      |      |      |       | 516  |      |      |      |      |      |      |      |        |      |        |      | 533  | 548  | 359    | 506  | 559  |      | 521  | 558  |      |
|      |      |      |       |      |      |      |      |      |      |      |      |        | 512  | 516    |      |      | 506  |        |      | 506  | 518  |      | 458  | 505  |
|      |      |      | 362vw |      |      | 357  |      |      |      |      |      | 350    |      |        | 367  |      |      | 315    | 314  | 436  |      | 363  | 311  |      |
|      |      |      | 313vw |      |      | 314  |      |      |      |      |      |        |      | 291    | 291  | 288  | 288  |        |      | 292  |      |      |      |      |
|      | 279  | 265  | 230vw | 244  | 261  | 242  | 240  | 260  |      | 266  |      | 242    | 242  | 245    | 244  | 240  | 244  | 233    | 244  | 253  | 249  | 247  | 249  |      |
|      | 179  | 170  |       |      | 163  |      |      | 170  |      | 175  |      |        |      | 126    |      |      | 126  |        |      | 128  |      |      | 150  | 147  |

B: broad, Amb.: ambient, w: weak intensity, vw: very weak, sh: shoulder, br: broad band

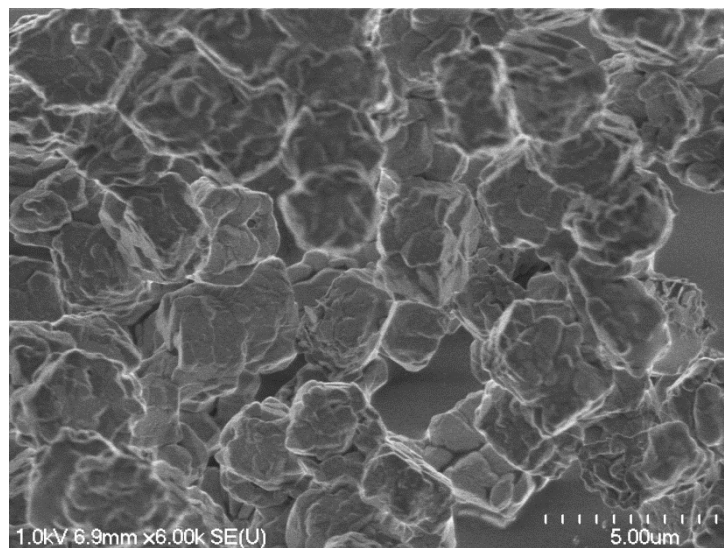

**Fig. S4.** Typical SEM image of 700°C annealed  $\beta$ -NaYF<sub>4</sub>:Er<sup>3+</sup>, Yb<sup>3+</sup> crystals (sample C3). The annealed crystals were ground before their fluorescence was measured (Figure 5).
